# Supplementary material for: Targeting basal-like breast tumors with bromodomain and extraterminal domain (BET) and polo-like kinase inhibitors
Source: PubMed Central journal article supplement (PMC5386699; doi:10.18632/oncotarget.14465), 2017-01-03
Supplement: oncotarget-08-19478-s001.pdf [file oncotarget-08-19478-s001.pdf]

## Targeting basal-like breast tumors with bromodomain and extraterminal domain (BET) and polo-like kinase inhibitors

### SUPPLEMENTARY TABLE

Supplementary Table 1: Expression of mitotic kinases in different breast cancer subtypes

| GSE45827    |                                                                         | NORMAL<br>BREAST(n=11)<br>vs BASAL<br>SAMPLE (n=41) | NORMAL<br>BREAST(n=11)<br>vs HER 2<br>SAMPLE<br>(n=30) | NORMAL<br>BREAST(n=11)<br>vs LUMINAL A<br>(n=29) | NORMAL<br>BREAST(n=11)<br>vs LUMINAL B<br>(n=30) | NORMAL<br>BREAST(n=11)<br>vs LUMINAL<br>A+B (n=59) |
|-------------|-------------------------------------------------------------------------|-----------------------------------------------------|--------------------------------------------------------|--------------------------------------------------|--------------------------------------------------|----------------------------------------------------|
| GENE SET    | GENE NAME                                                               |                                                     |                                                        |                                                  |                                                  |                                                    |
| 204641_at   | NEK2. NIMA<br>(never in mitosis<br>gene a)-related<br>kinase 2          | 18.24                                               | 5.88                                                   | ---                                              | 5.02                                             | ---                                                |
| 219148_at   | PBK. PDZ<br>binding kinase                                              | 12.07                                               | 9.8                                                    | ---                                              | 6.61                                             | 4.32                                               |
| 204822_at   | TTK protein<br>kinase                                                   | 11.91                                               | 11.33                                                  | ---                                              | 6.06                                             | ---                                                |
| 208079_s_at | AURKA. Aurora<br>kinase A                                               | 10.01                                               | 7.23                                                   | ---                                              | 6.35                                             | ---                                                |
| 209464_at   | AURKB. Aurora<br>kinase B                                               | 4.06                                                | 4.63                                                   | ---                                              | ---                                              | ---                                                |
| 209642_at   | BUB1. Budding<br>uninhibited by<br>benzimidazoles<br>1 homolog          | 11.78                                               | 7.11                                                   | ---                                              | 4.95                                             | ---                                                |
| 203755_at   | BUB1B.<br>Budding<br>uninhibited by<br>benzimidazoles<br>1 homolog beta | 6.42                                                | 9.59                                                   | ---                                              | 6.26                                             | 4.05                                               |
| 203213_at   | CDC2. Cell<br>division cycle 2,<br>G1 to S and G2<br>to M               | 17.95                                               | 12.04                                                  | ---                                              | 9.6                                              | 5.39                                               |
| 243831_at   | MAPK6.<br>Mitogen-<br>activated protein<br>kinase 6                     | 6.27                                                | ---                                                    | --                                               | ---                                              | ---                                                |
| 202240_at   | PLK1. Polo-like<br>kinase 1                                             | 6.13                                                | 2.89                                                   | ---                                              | ---                                              | ---                                                |
